# Supplementary material for: Kinetics of Nucleo- and Spike Protein-Specific Immunoglobulin G and of Virus-Neutralizing Antibodies after SARS-CoV-2 Infection
Source: MDPI journal article supplement (doi:10.3390/microorganisms8101572), 2020-10-13
Supplement: s1 [file s1]

**Table S1:** Characteristics of the eight SARS-CoV-2 IgG/total antibody tests.

| <b>Assay</b>                                  | <b>Manufacturer</b> | <b>Assay principle</b>                     | <b>Immunoglobuline (Ig) class</b> | <b>SARS-CoV-2 antigen(s)</b>             |
|-----------------------------------------------|---------------------|--------------------------------------------|-----------------------------------|------------------------------------------|
| SARS-CoV-2-IgG-Assay                          | Abbott              | chemiluminescent microparticle immunoassay | IgG                               | nucleoprotein                            |
| LIAISON® SARS-CoV-2 S1/S2 IgG                 | Diasorin            | chemiluminescence immunoassay              | IgG                               | spike protein units S1&S2                |
| EDI™ Novel Coronavirus COVID-19 IgG ELISA Kit | Epitope Diagnostics | enzyme-linked immuno sorbent assay         | IgG                               | nucleoprotein                            |
| SARS-CoV-2-ELISA                              | Euroimmun           | enzyme-linked immuno sorbent assay         | IgG                               | spike protein unit S1                    |
| recomWell SARS-CoV-2 IgG                      | Mikrogen            | enzyme-linked immuno sorbent assay         | IgG                               | nucleoprotein                            |
| Elecsys Anti-SARS-CoV-2                       | Roche               | electro-chemiluminescence immunoassay      | total antibodies                  | nucleoprotein                            |
| SARS-CoV-2 ViraChip® IgG                      | Viramed             | microarray                                 | IgG                               | spike protein units S1&S2, nucleoprotein |
| SERION ELISA agile SARS-COV-2 IgG             | Virion-Serion       | enzyme-linked immuno sorbent assay         | IgG                               | whole spike protein                      |
