# Supplementary material for: Kinetics of Nucleo- and Spike Protein-Specific Immunoglobulin G and of Virus-Neutralizing Antibodies after SARS-CoV-2 Infection
Source: MDPI journal article supplement (doi:10.3390/microorganisms8101572), 2020-10-13
Supplement: s1 [file s1]

**Figure S3:** Development of high SARS-CoV-2 IgG avidities in three SARS-CoV-2 patients.

# **SARS-CoV-2**

## **Patient 1**

4 d.a.P.

6 d.a.P.

8 d.a.P.

11 d.a.P.

15 d.a.P.

26 d.a.P.

102 d.a.P.

132 d.a.P.

161 d.a.P.

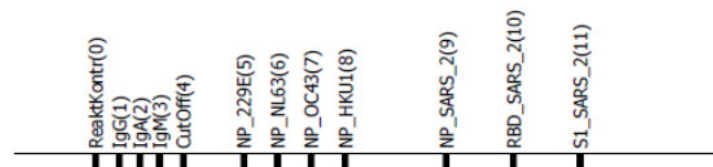

|    |          |     |          |  |                                                                                                                              |
|----|----------|-----|----------|--|------------------------------------------------------------------------------------------------------------------------------|
| 1  | Patient  | IgG | 42110507 |  | NP_OC43(3,8); NP_HKU1(3,3)                                                                                                   |
| 1  | Patient  | IgG | 42111625 |  | NP_229E(1,1); NP_NL63(1,8); NP_OC43(4,1); NP_HKU1(4,4)                                                                       |
| 2  | Avidität | IgG | 42111625 |  | NP_229E(0.70=h); NP_NL63(0.71=h); NP_OC43(0.60=n); NP_HKU1(0.48=n)                                                           |
| 2  | Patient  | IgG | 42114145 |  | NP_NL63(2,2); NP_OC43(3,2); NP_HKU1(2,8); NP_SARS_2(3,4); RBD_SARS_2(1,9); S1_SARS_2(2,4)                                    |
| 3  | Patient  | IgG | 42115601 |  | NP_229E(2,0); NP_NL63(2,5); NP_OC43(2,3); NP_HKU1(2,4); NP_SARS_2(6,3); RBD_SARS_2(6,8); S1_SARS_2(7,1)                      |
| 4  | Avidität | IgG | 42115601 |  | NP_229E(0.59=n); NP_NL63(0.85=h); NP_OC43(0.68=h); NP_HKU1(0.62=h); NP_SARS_2(0.11=n); RBD_SARS_2(0.31=n); S1_SARS_2(0.24=n) |
| 1  | Patient  | IgG | 42120066 |  | NP_229E(2,1); NP_NL63(3,0); NP_OC43(3,3); NP_HKU1(3,0); NP_SARS_2(6,4); RBD_SARS_2(6,8); S1_SARS_2(7,0)                      |
| 2  | Avidität | IgG | 42120066 |  | NP_229E(0.28=n); NP_NL63(0.79=h); NP_OC43(0.50=n); NP_HKU1(0.45=n); NP_SARS_2(0.11=n); RBD_SARS_2(0.24=n); S1_SARS_2(0.21=n) |
| 1  | Patient  | IgG | 42127890 |  | NP_229E(3,0); NP_NL63(3,7); NP_OC43(4,9); NP_HKU1(3,9); NP_SARS_2(9,6); RBD_SARS_2(10,1); S1_SARS_2(10,2)                    |
| 2  | Avidität | IgG | 42127890 |  | NP_229E(0.30=n); NP_NL63(0.69=h); NP_OC43(0.42=n); NP_HKU1(0.44=n); NP_SARS_2(0.14=n); RBD_SARS_2(0.28=n); S1_SARS_2(0.29=n) |
| 19 | Patient  | IgG | 42222720 |  | NP_229E(1,8); NP_NL63(2,8); NP_OC43(3,6); NP_HKU1(2,6); NP_SARS_2(10,1); RBD_SARS_2(10,1); S1_SARS_2(10,2)                   |
| 20 | Avidität | IgG | 42222720 |  | NP_229E(0.43=n); NP_NL63(0.70=h); NP_OC43(0.52=n); NP_HKU1(0.56=n); NP_SARS_2(0.77=h); RBD_SARS_2(0.93=h); S1_SARS_2(0.93=h) |
| 1  | Avidität | IgG | 42264860 |  | NP_229E(0.00=n); NP_NL63(0.31=n); NP_OC43(0.27=n); NP_HKU1(0.38=n); NP_SARS_2(0.40=n); RBD_SARS_2(0.76=h); S1_SARS_2(0.78=h) |
| 2  | Patient  | IgG | 42264860 |  | NP_229E(1,2); NP_NL63(2,2); NP_OC43(2,4); NP_HKU1(1,6); NP_SARS_2(10,5); RBD_SARS_2(10,3); S1_SARS_2(10,1)                   |
| 1  | Patient  | IgG | 42308810 |  | NP_NL63(1,6); NP_OC43(2,6); NP_HKU1(1,7); NP_SARS_2(7,2); RBD_SARS_2(6,9); S1_SARS_2(6,8)                                    |
| 2  | Avidität | IgG | 42308810 |  | NP_NL63(0.74=h); NP_OC43(0.47=n); NP_HKU1(0.36=n); NP_SARS_2(0.60=n); RBD_SARS_2(0.86=h); S1_SARS_2(0.90=h)                  |

d.a.P, days after the positive SARS-CoV-2 PCR

Figure S3: continued.

## SARS-CoV-2

### Patient 18

26 d.a.P.

46 d.a.P.

91 d.a.P.

130 d.a.P.

147 d.a.P.

## SARS-CoV-2

### Patient 21

19 d.a.P.

65 d.a.P.

104 d.a.P.

121 d.a.P.

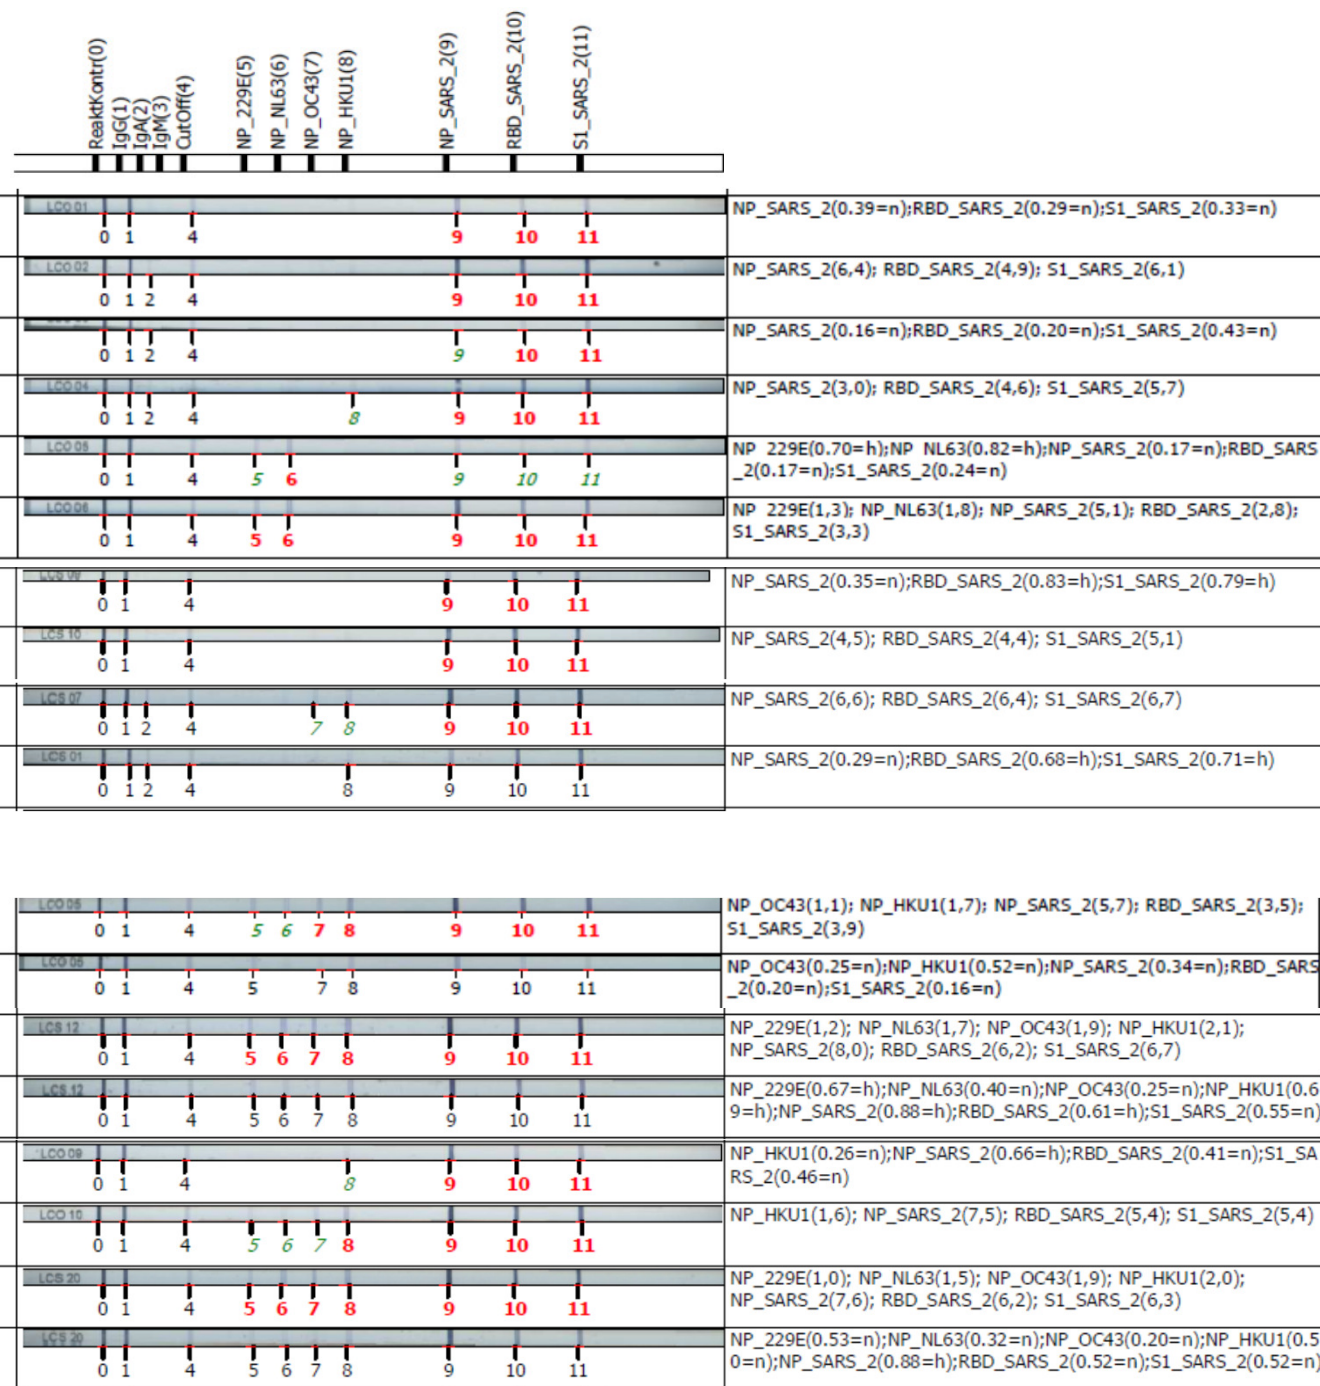

d.a.P, days after the positive SARS-CoV-2 PCR
