# Supplementary material for: Kinetics of Nucleo- and Spike Protein-Specific Immunoglobulin G and of Virus-Neutralizing Antibodies after SARS-CoV-2 Infection
Source: MDPI journal article supplement (doi:10.3390/microorganisms8101572), 2020-10-13
Supplement: s1 [file s1]

**Figure S2:** Raw data from the plaque reduction neutralization test to investigate the kinetics of virus-neutralizing antibodies.

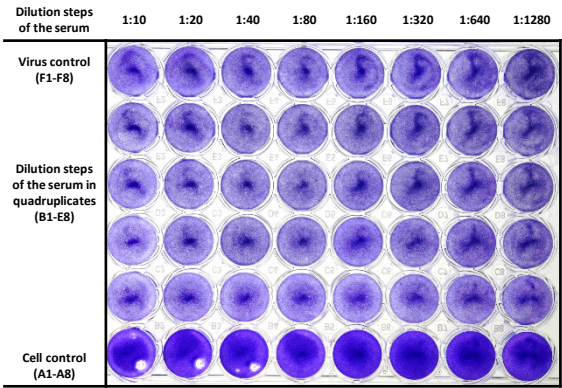

**SARS-CoV-2 patient 1 (4 d.a.P.):**  
PRNT<sub>50</sub>: < 1:10.

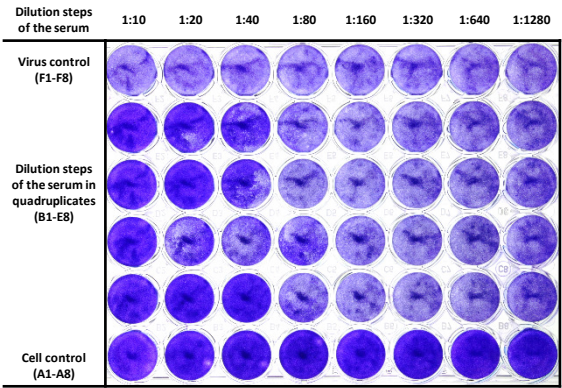

**SARS-CoV-2 patient 1 (6 d.a.P.):**  
PRNT<sub>50</sub>: 1:20 – 1:40.

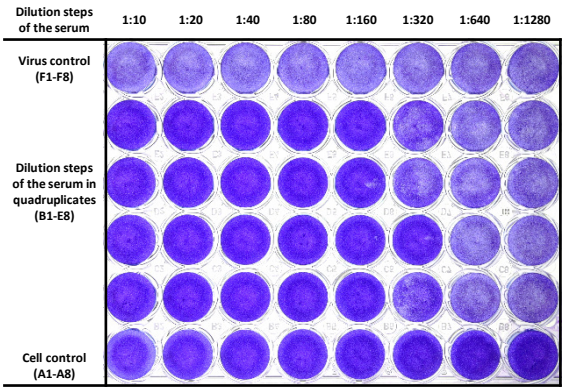

**SARS-CoV-2 patient 1 (8 d.a.P.):**  
PRNT<sub>50</sub>: 1:160.

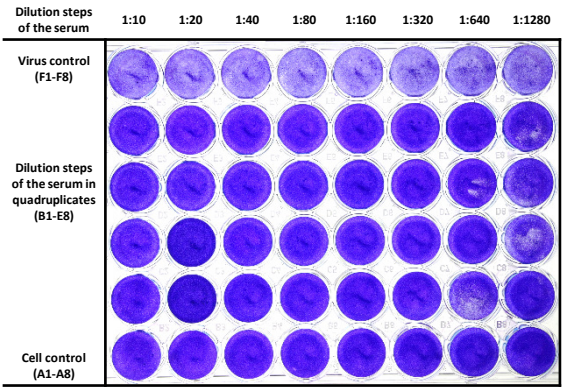

**SARS-CoV-2 patient 1 (11 d.a.P.):**  
PRNT<sub>50</sub>: 1:640 – 1:1280.

d.a.P., days after positive PCR test

Figure S2: continued.

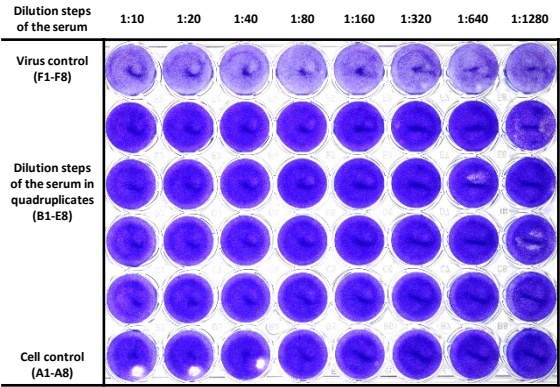

SARS-CoV-2 patient 1 (15 d.a.P.):  
PRNT<sub>50</sub>:  $\geq 1:1280$ .

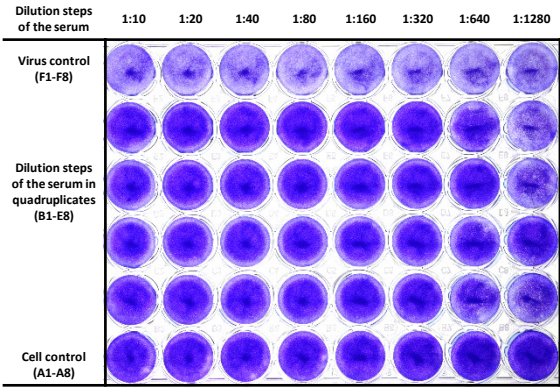

SARS-CoV-2 patient 1 (26 d.a.P.):  
PRNT<sub>50</sub>: 1:320 – 1:640.

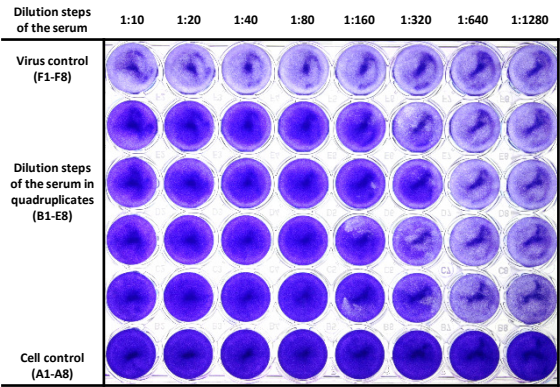

SARS-CoV-2 patient 1 (102 d.a.P.):  
PRNT<sub>50</sub>: 1:160.

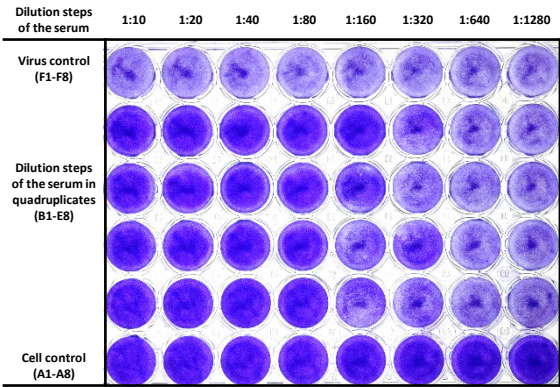

SARS-CoV-2 patient 1 (132 d.a.P.):  
PRNT<sub>50</sub>: 1:80.

d.a.P., days after positive PCR test

Figure S2: continued.

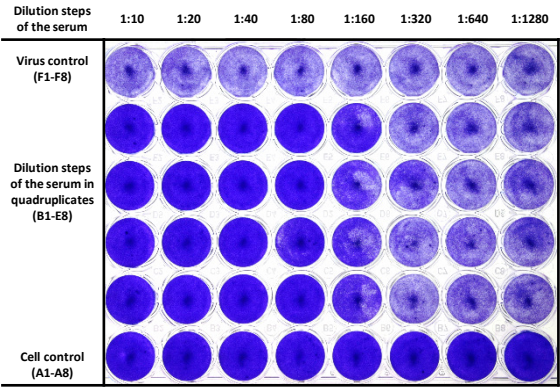

SARS-CoV-2 patient 1 (161 d.a.P.):

PRNT<sub>50</sub>: 1:80.

d.a.P., days after positive PCR test



Figure S2: continued.

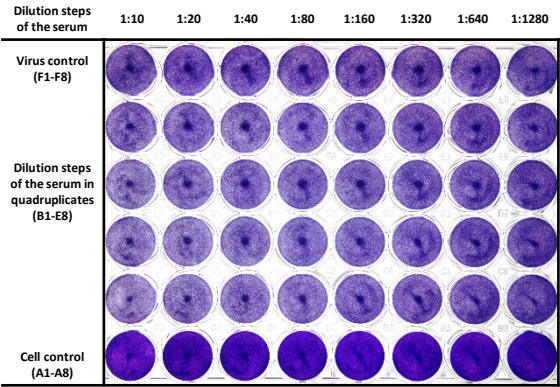

SARS-CoV-2 patient 2 (9 d.b.P.):  
PRNT<sub>50</sub>: < 1:10.

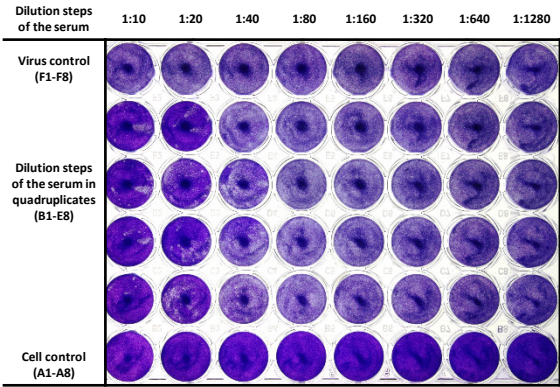

SARS-CoV-2 patient 2 (19 d.a.P.):  
PRNT<sub>50</sub>: 1:10 – 1:20.

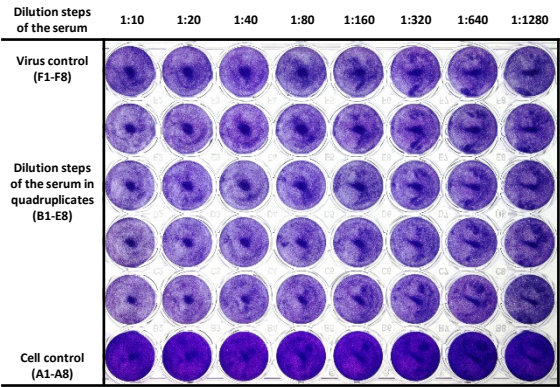

SARS-CoV-2 patient 2 (71 d.a.P.):  
PRNT<sub>50</sub>: < 1:10.

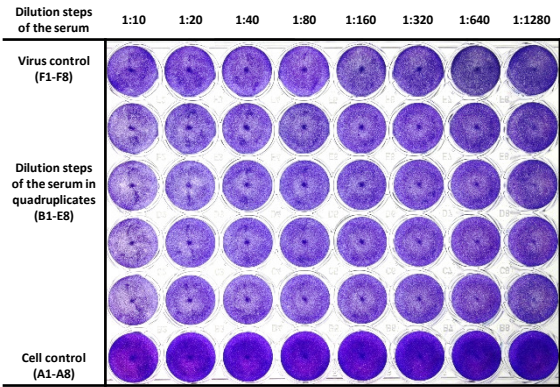

SARS-CoV-2 patient 2 (97 d.a.P.):  
PRNT<sub>50</sub>: < 1:10.

d.a.P., days after positive PCR test  
d.b.P., days before the positive PCR test



Figure S2: continued.

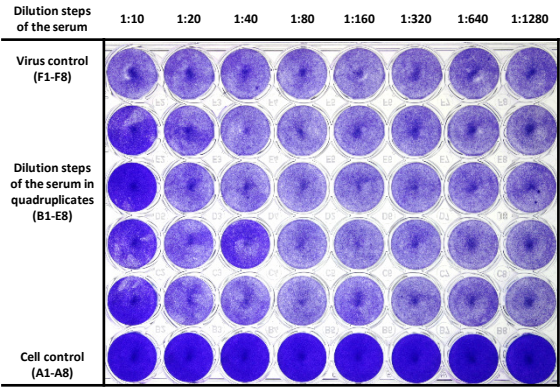

SARS-CoV-2 patient 2 (165 d.a.P.):  
PRNT<sub>50</sub>: 1:10.

Figure S2: continued.

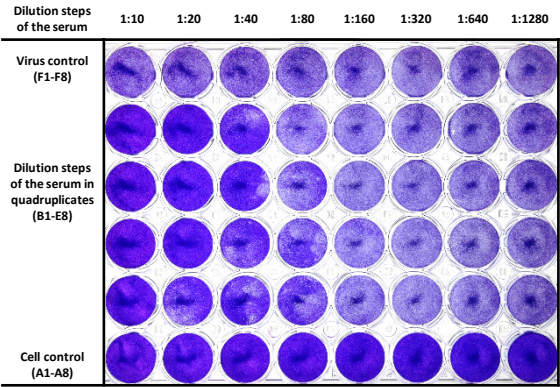

SARS-CoV-2 patient 4 (14 d.a.P.):  
PRNT<sub>50</sub>: 1:20 – 1:40.

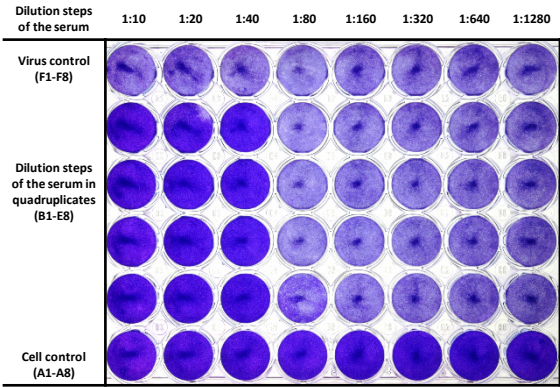

SARS-CoV-2 patient 4 (121 d.a.P.):  
PRNT<sub>50</sub>: 1:40.

d.a.P., days after positive PCR test

Figure S2: continued.

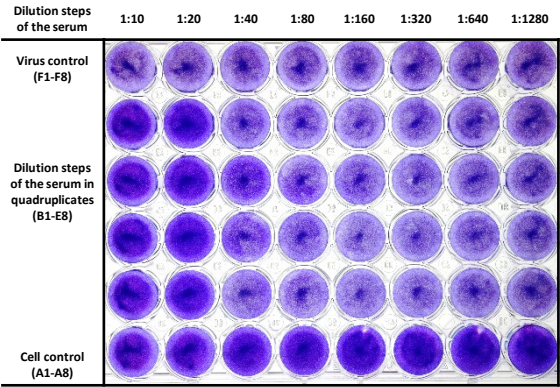

SARS-CoV-2 patient 9 (10 d.a.P.):  
PRNT<sub>50</sub>: 1:20.

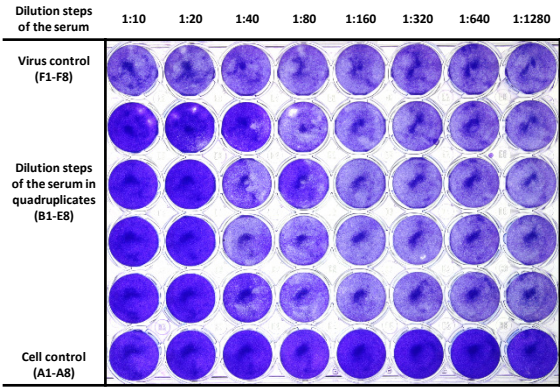

SARS-CoV-2 patient 9 (16 d.a.P.):  
PRNT<sub>50</sub>: 1:20.

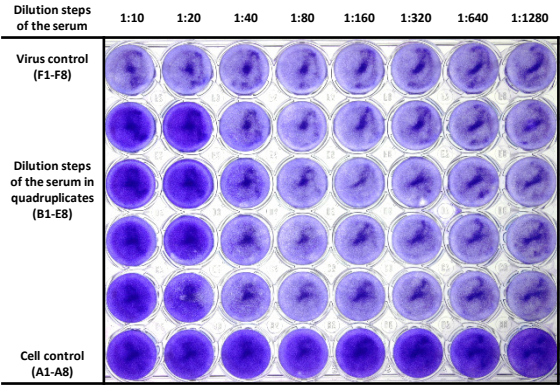

SARS-CoV-2 patient 9 (80 d.a.P.):  
PRNT<sub>50</sub>: 1:20.

d.a.P., days after positive PCR test



Figure S2: continued.

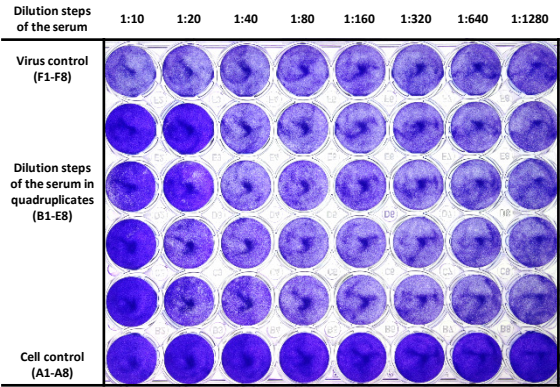

**SARS-CoV-2 patient 11 (19 d.a.P.):**  
PRNT<sub>50</sub>: 1:10.

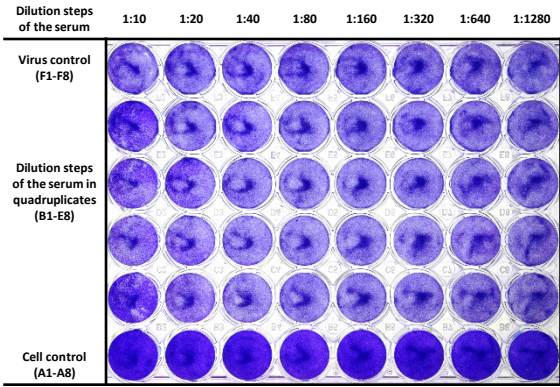

**SARS-CoV-2 patient 11 (99 d.a.P.):**  
PRNT<sub>50</sub>: < 1:10.

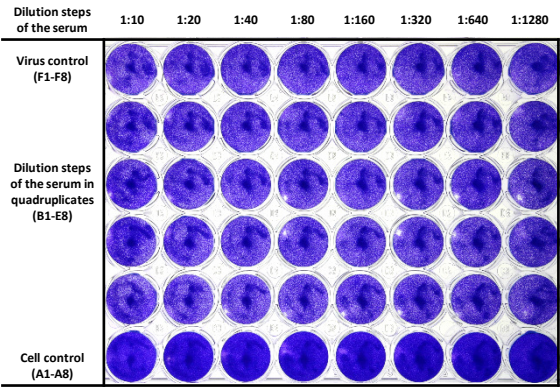

**SARS-CoV-2 patient 11 (154 d.a.P.):**  
PRNT<sub>50</sub>: < 1:10.

d.a.P., days after positive PCR test

Figure S2: continued.

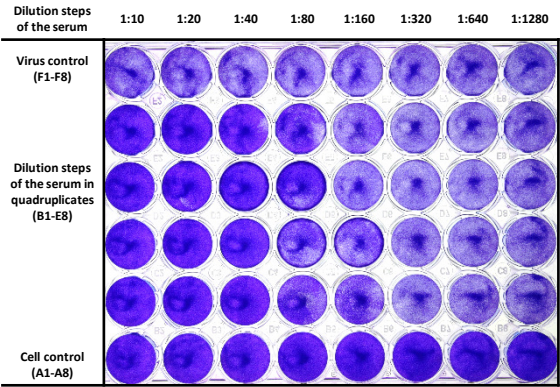

SARS-CoV-2 patient 14 (22 d.a.P.):

PRNT<sub>50</sub>: 1:40.

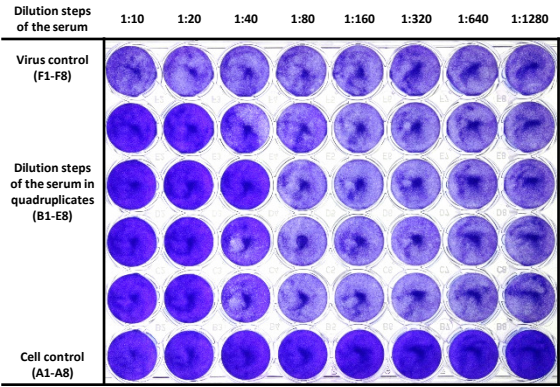

SARS-CoV-2 patient 14 (92 d.a.P.):

PRNT<sub>50</sub>: 1:20 – 1:40.

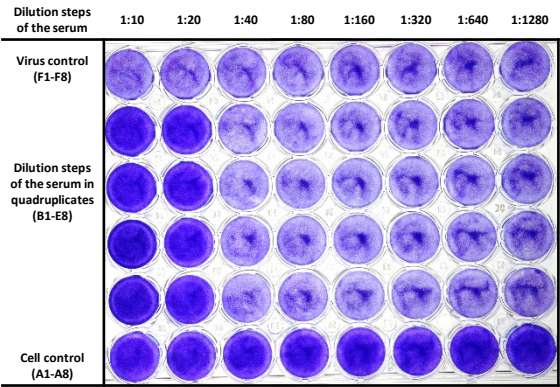

SARS-CoV-2 patient 14 (127 d.a.P.):

PRNT<sub>50</sub>: 1:20.

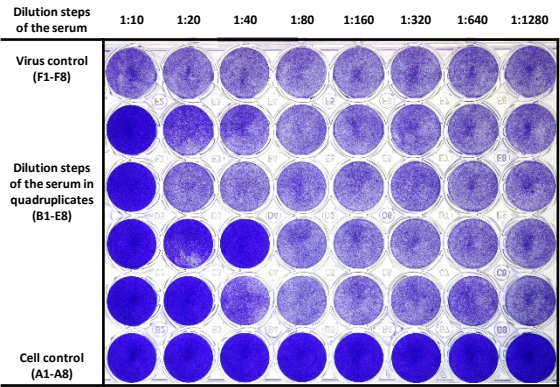

SARS-CoV-2 patient 14 (153 d.a.P.):

PRNT<sub>50</sub>: 1:10 – 1:20.

d.a.P., days after positive PCR test



Figure S2: continued.

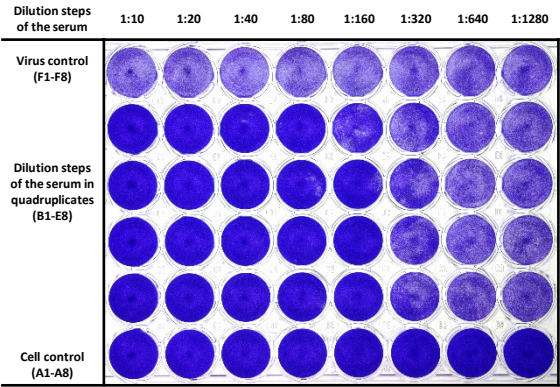

SARS-CoV-2 patient 18 (26 d.a.P.):

PRNT<sub>50</sub>: 1:160.

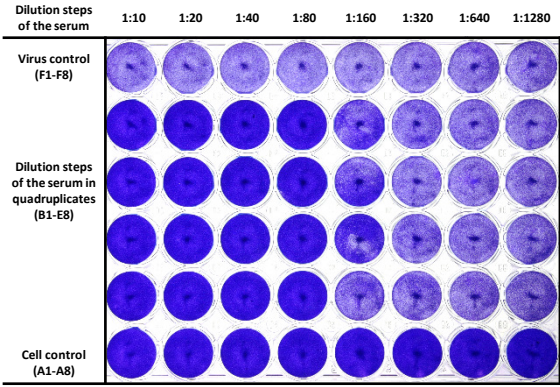

SARS-CoV-2 patient 18 (46 d.a.P.):

PRNT<sub>50</sub>: 1:80.

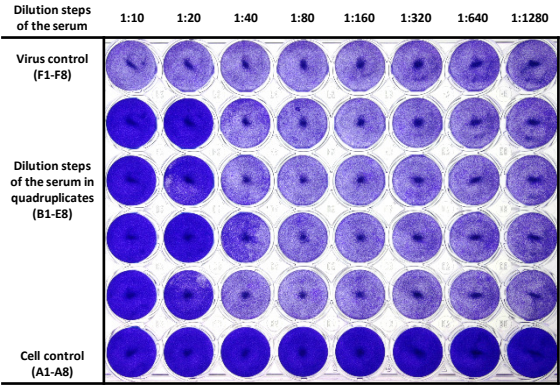

SARS-CoV-2 patient 18 (91 d.a.P.):

PRNT<sub>50</sub>: 1:20.

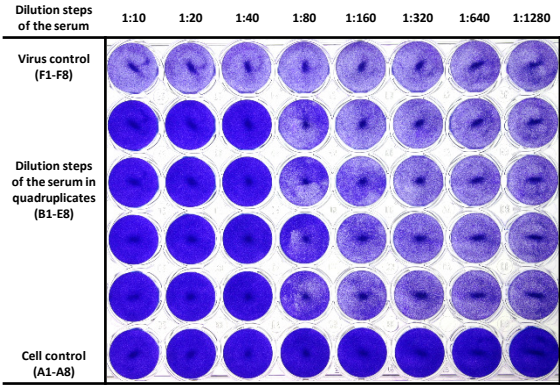

SARS-CoV-2 patient 18 (130 d.a.P.):

PRNT<sub>50</sub>: 1:40.

d.a.P., days after positive PCR test



Figure S2: continued.

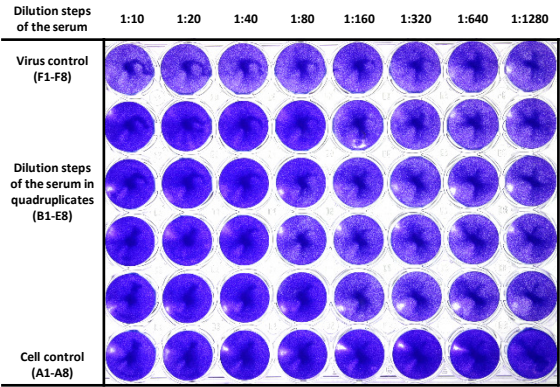

SARS-CoV-2 patient 18 (147 d.a.P.):

PRNT<sub>50</sub>: 1:40.

Figure S2: continued.

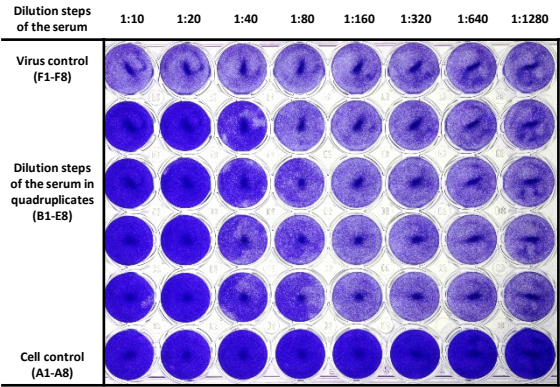

SARS-CoV-2 patient 19 (27 d.a.P.):

PRNT<sub>50</sub>: 1:20 – 1:40.

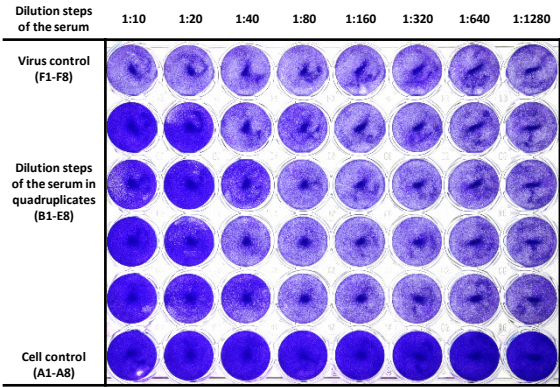

SARS-CoV-2 patient 19 (47 d.a.P.):

PRNT<sub>50</sub>: 1:20.

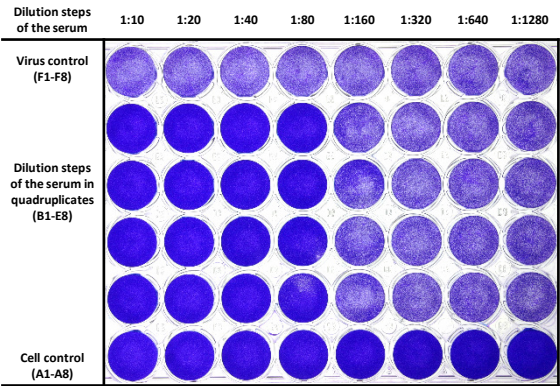

SARS-CoV-2 patient 19 (92 d.a.P.):

PRNT<sub>50</sub>: 1:80.

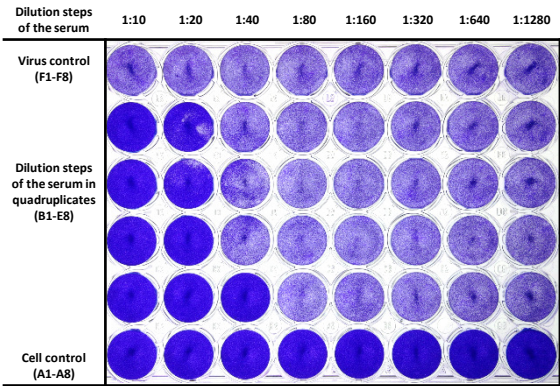

SARS-CoV-2 patient 19 (131 d.a.P.):

PRNT<sub>50</sub>: 1:20.

d.a.P., days after positive PCR test

Figure S2: continued.

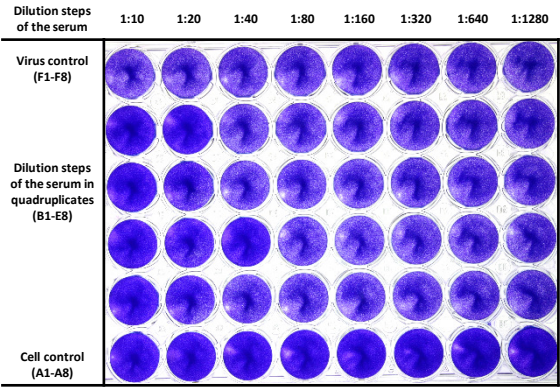

SARS-CoV-2 patient 19 (148 d.a.P.):

PRNT<sub>50</sub>: 1:20.



Figure S2: continued.

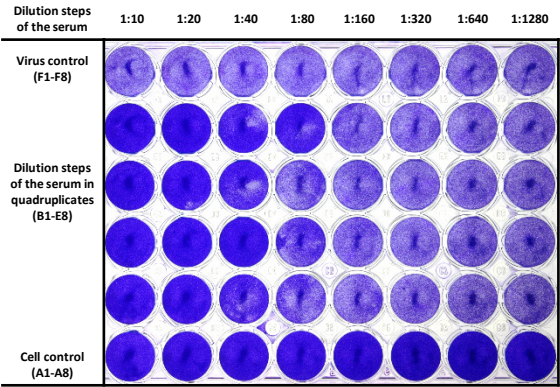

SARS-CoV-2 patient 21 (19 d.a.P.):

PRNT<sub>50</sub>: 1:40.

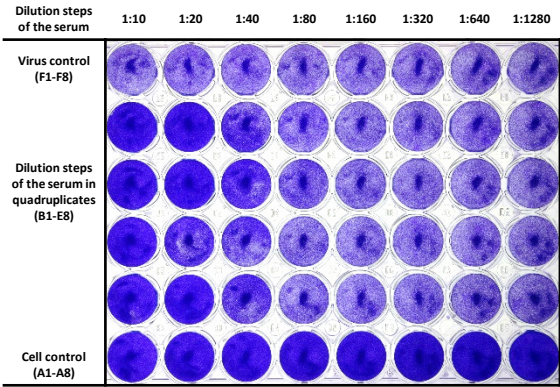

SARS-CoV-2 patient 21 (65 d.a.P.):

PRNT<sub>50</sub>: 1:20.

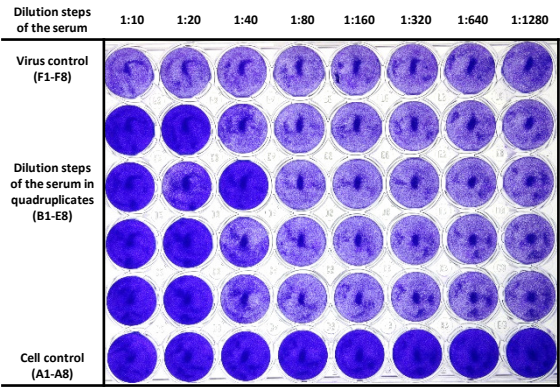

SARS-CoV-2 patient 21 (104 d.a.P.):

PRNT<sub>50</sub>: 1:20.

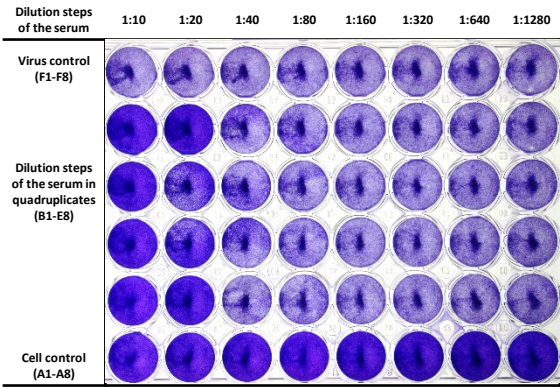

SARS-CoV-2 patient 21 (121 d.a.P.):

PRNT<sub>50</sub>: 1:20.

d.a.P., days after positive PCR test

Figure S2: continued.

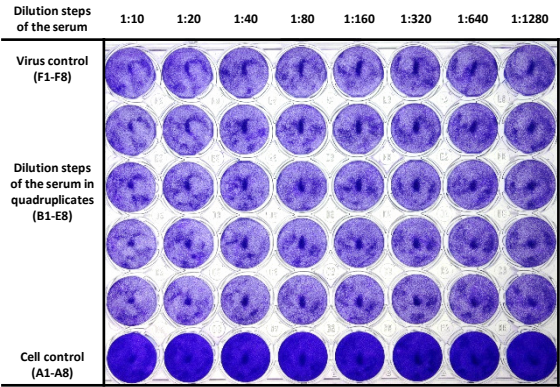

SARS-CoV-2 patient 22 (46 d.a.P.):  
PRNT<sub>50</sub>: < 1:10.

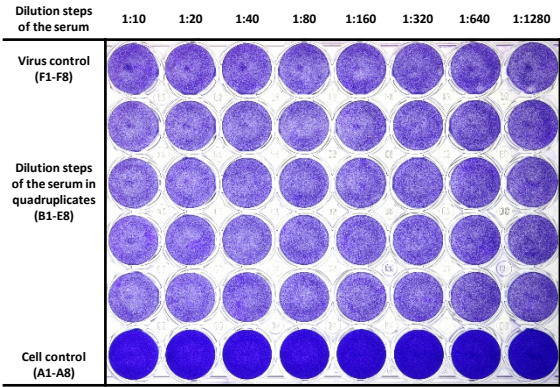

SARS-CoV-2 patient 22 (60 d.a.P.):  
PRNT<sub>50</sub>: < 1:10.

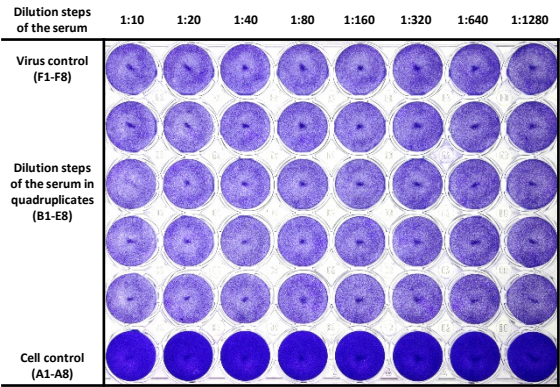

SARS-CoV-2 patient 22 (104 d.a.P.):  
PRNT<sub>50</sub>: < 1:10.

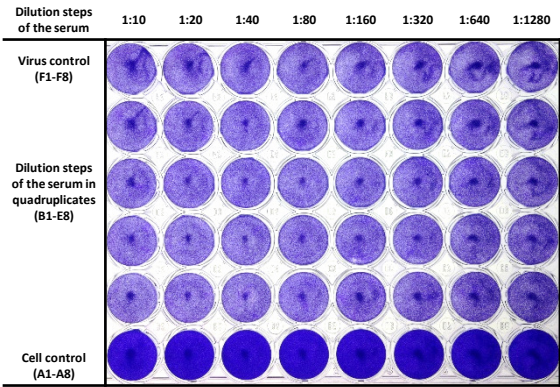

SARS-CoV-2 patient 22 (141 d.a.P.):  
PRNT<sub>50</sub>: < 1:10.

d.a.P., days after positive PCR test

Figure S2: continued.

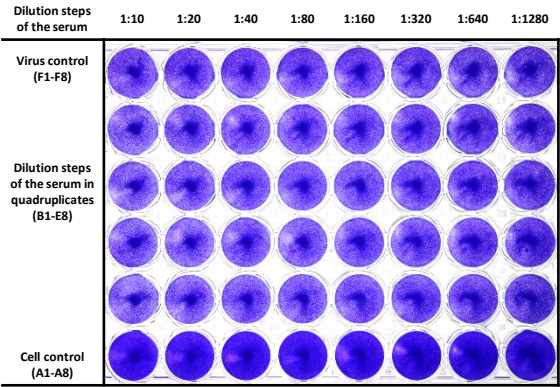

SARS-CoV-2 patient 22 (161 d.a.P.):  
PRNT<sub>50</sub>: < 1:10.

d.a.P., days after positive PCR test



Figure S2: continued.

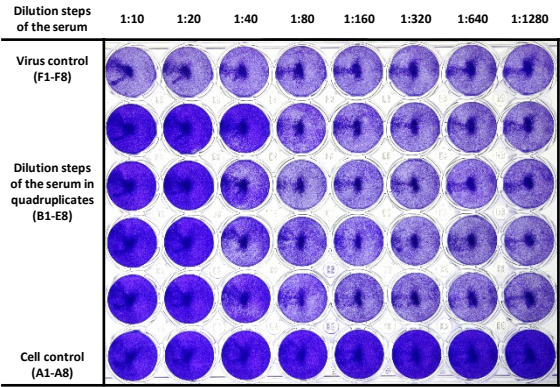

SARS-CoV-2 patient 26 (35 d.a.P.):

PRNT<sub>50</sub>: 1:20.

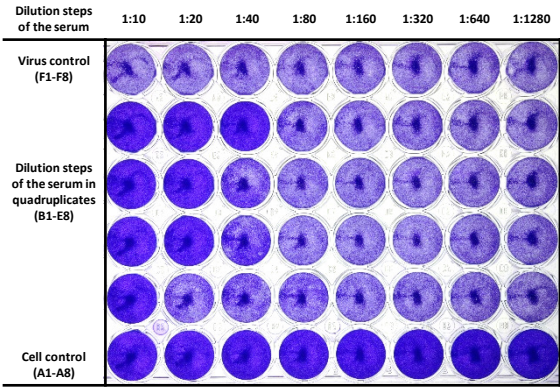

SARS-CoV-2 patient 26 (85 d.a.P.):

PRNT<sub>50</sub>: 1:20.

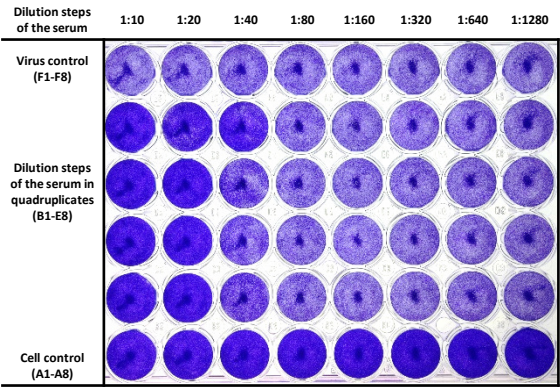

SARS-CoV-2 patient 26 (113 d.a.P.):

PRNT<sub>50</sub>: 1:20.

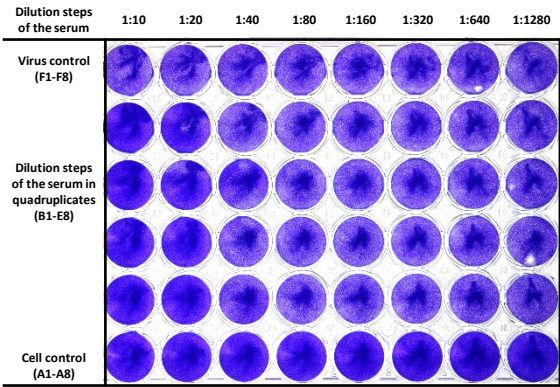

SARS-CoV-2 patient 26 (140 d.a.P.):

PRNT<sub>50</sub>: 1:20.

d.a.P., days after positive PCR test

Figure S2: continued.

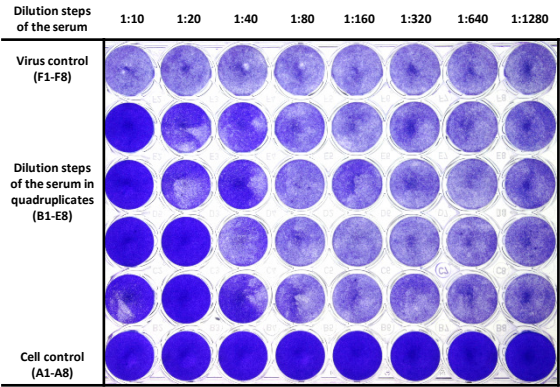

Routine 4\* (27 d.a.P.):  
PRNT<sub>50</sub>: 1:20.

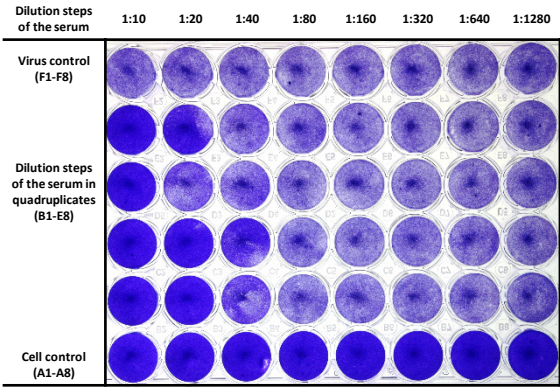

Routine 4\* (153 d.a.P.):  
PRNT<sub>50</sub>: 1:20.

d.a.P., days after positive PCR test  
\* with respect to SARS-CoV-2 patient 14

Figure S2: continued.

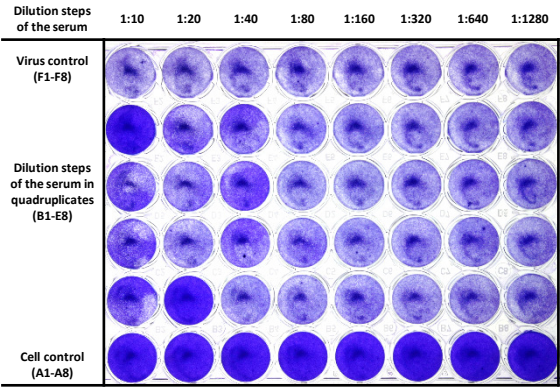

**Routine 5\* (27 d.a.P.):**  
PRNT<sub>50</sub>: ≤ 1:10.

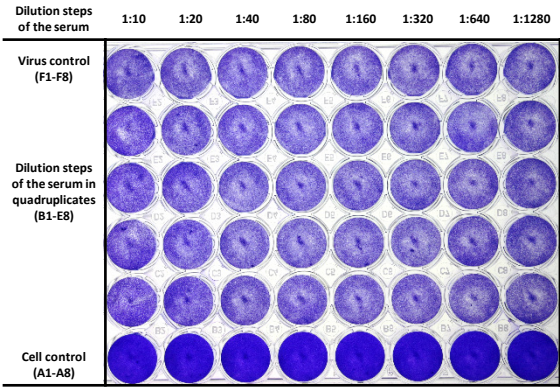

**Routine 5\* (156 d.a.P.):**  
PRNT<sub>50</sub>: < 1:10.

d.a.P., days after positive PCR test  
\* with respect to SARS-CoV-2 patient 14



Figure S2: continued.

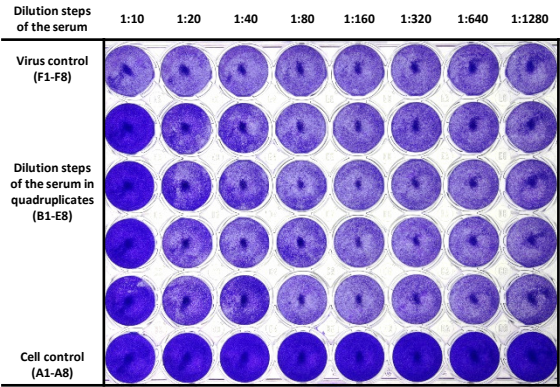

**Routine 6\* (27 d.a.P.):**  
PRNT<sub>50</sub>: 1:10.

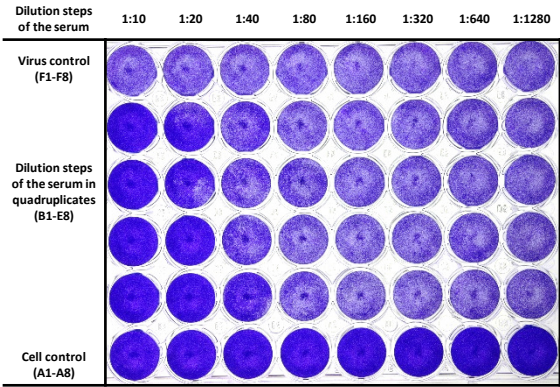

**Routine 6\* (92 d.a.P.):**  
PRNT<sub>50</sub>: 1:20.

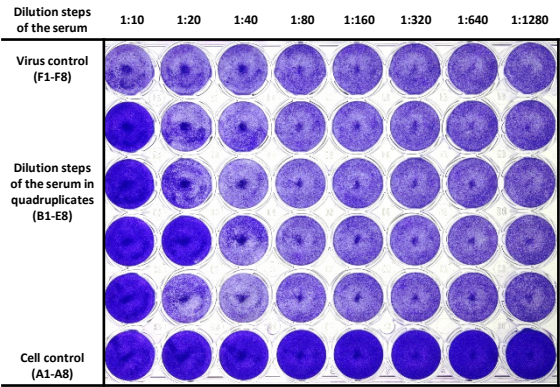

**Routine 6\* (127 d.a.P.):**  
PRNT<sub>50</sub>: 1:10.

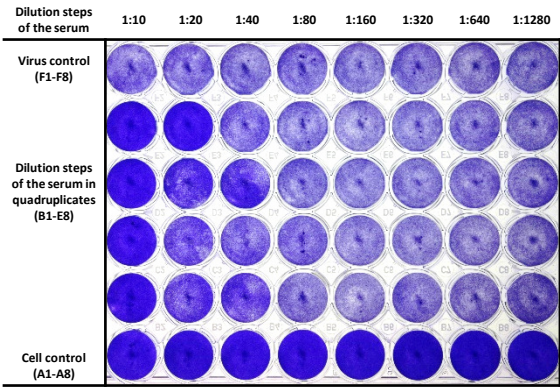

**Routine 6\* (153 d.a.P.):**  
PRNT<sub>50</sub>: 1:10.

d.a.P., days after positive PCR test  
\* with respect to SARS-CoV-2 patient 14



Figure S2: continued.

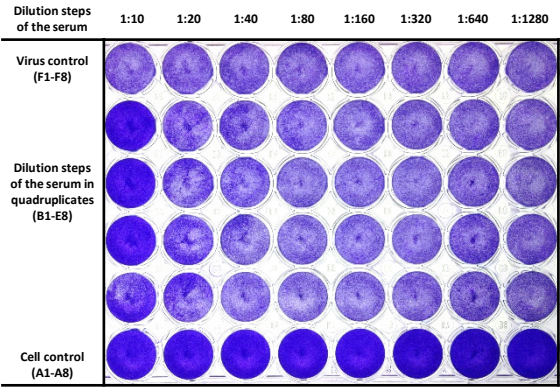

**Routine 13\* (92 d.a.P.):**  
PRNT<sub>50</sub>: 1:10.

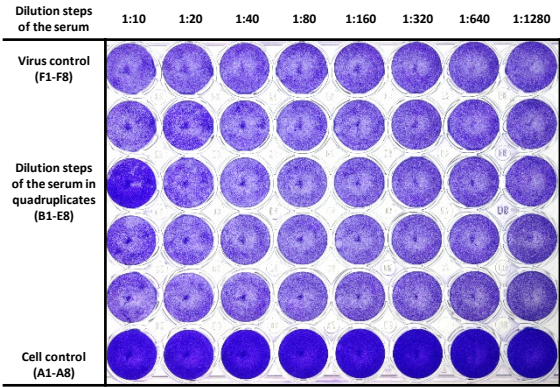

**Routine 13\* (127 d.a.P.):**  
PRNT<sub>50</sub>: < 1:10.

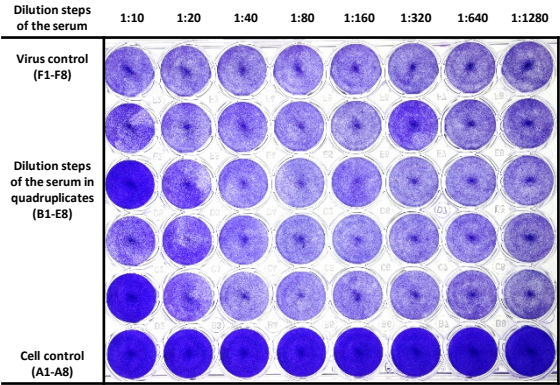

**Routine 13\* (153 d.a.P.):**  
PRNT<sub>50</sub>: ≤ 1:10.

d.a.P., days after positive PCR test  
\* with respect to SARS-CoV-2 patient 14

Figure S2: continued.

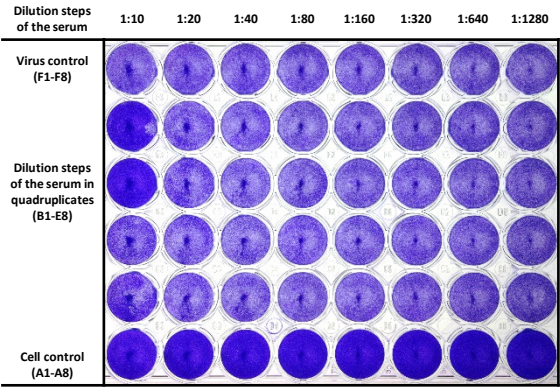

**Routine 8 (0 d.a.P.):**  
PRNT<sub>50</sub>: ≤ 1:10.

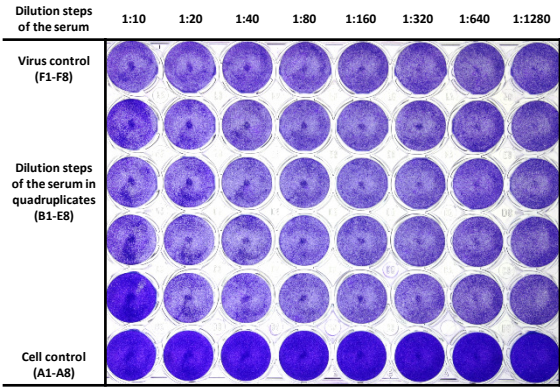

**Routine 8 (112 d.a.P.):**  
PRNT<sub>50</sub>: < 1:10.
