# Supplementary material for: Kinetics of Nucleo- and Spike Protein-Specific Immunoglobulin G and of Virus-Neutralizing Antibodies after SARS-CoV-2 Infection
Source: MDPI journal article supplement (doi:10.3390/microorganisms8101572), 2020-10-13
Supplement: s1 [file s1]

**Figure S1:** Raw data from the plaque reduction neutralization test used as reference #2 in the validation part of this study.

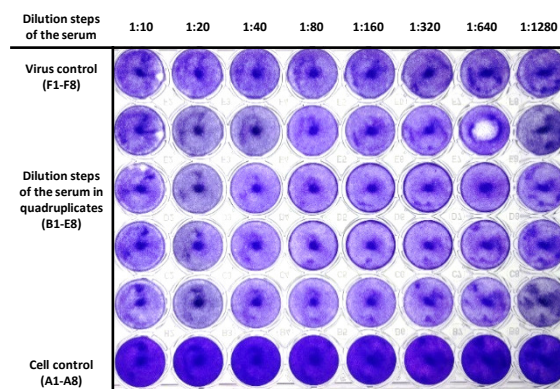

**Archived serum (12641696, #3):**  
PRNT <1:10.

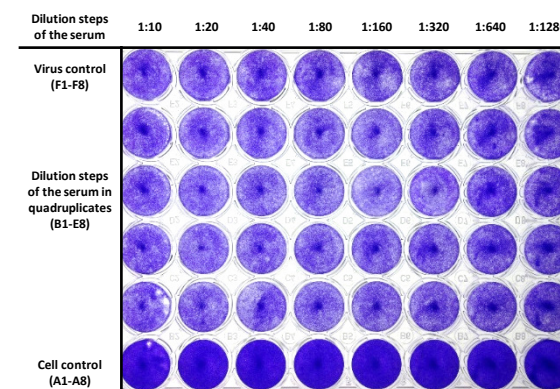

**Archived serum (12700966, #8):**  
PRNT <1:10.

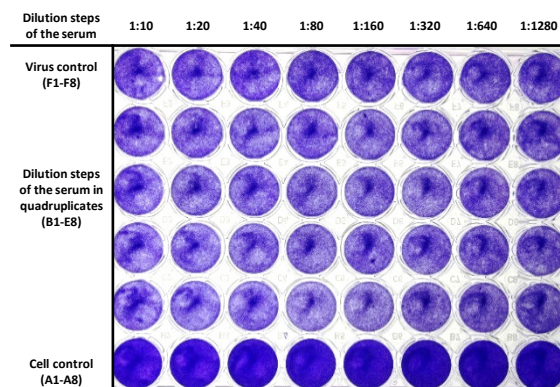

**Archived serum (41354992, #1):**  
PRNT <1:10.

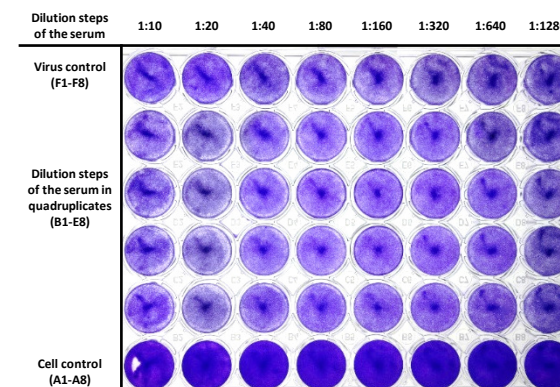

**Archived serum (41379572, #2):**  
PRNT <1:10.

**Figure S1: continued.**

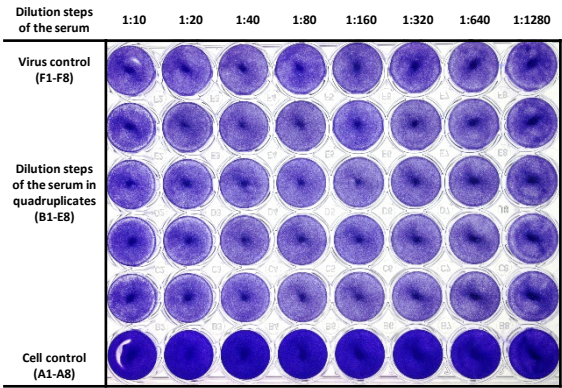

**Archived serum (41413833, #5):**  
PRNT <1:10.

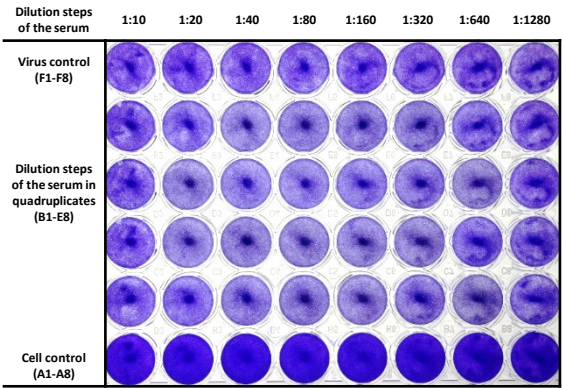

**Archived serum (41418016, #4):**  
PRNT <1:10.

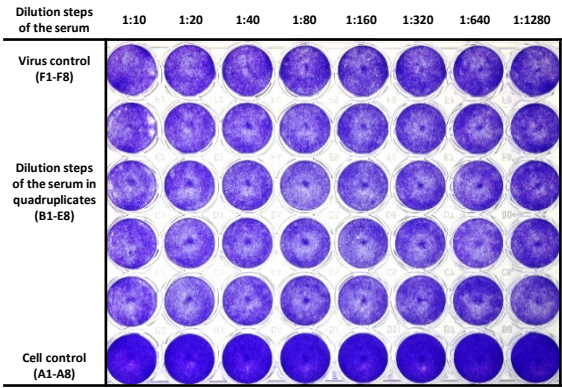

**Archived serum (41533704, #6):**  
PRNT <1:10.

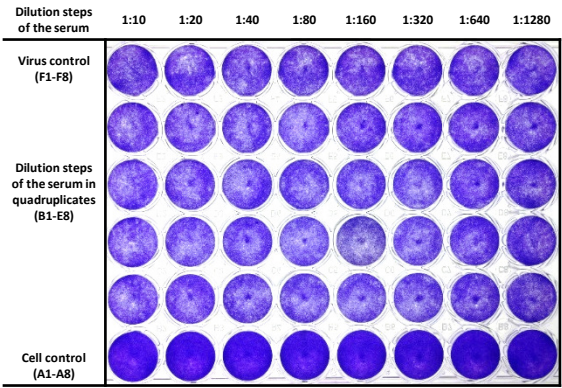

**Archived serum (41543646, #7):**  
PRNT <1:10.

**Figure S1: continued.**

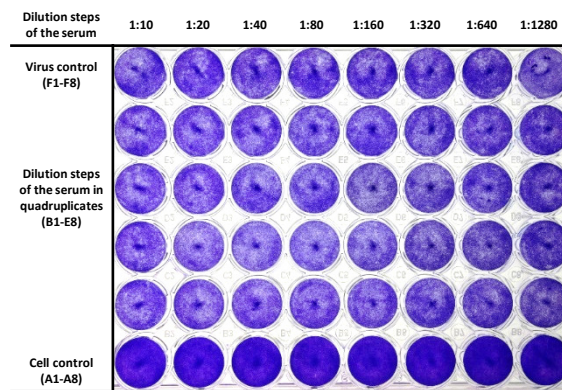

**Archived serum (41572497, #9):**  
PRNT <1:10.

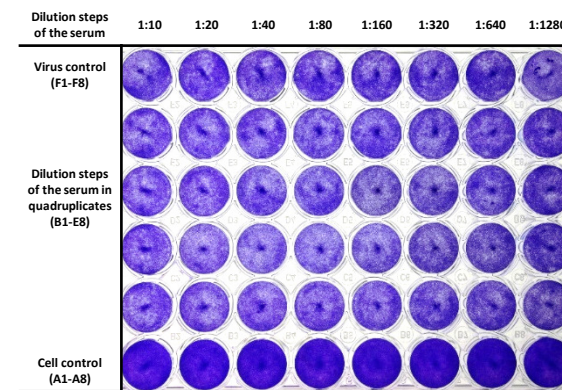

**Archived serum (41580810, #10):**  
PRNT <1:10.



Figure S1: continued.

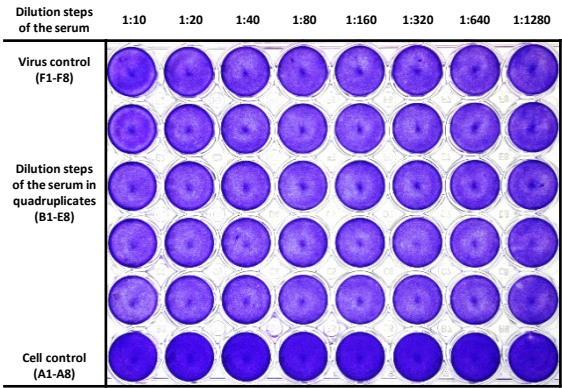

SARS-CoV-2 patient 1 (4 d.a.P.):  
PRNT <1:10.

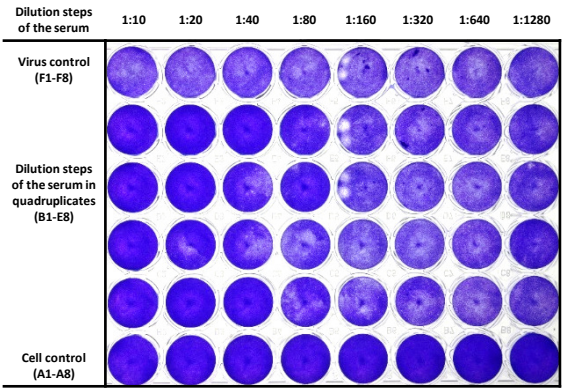

SARS-CoV-2 patient 1 (6 d.a.P.):  
PRNT 1:40.

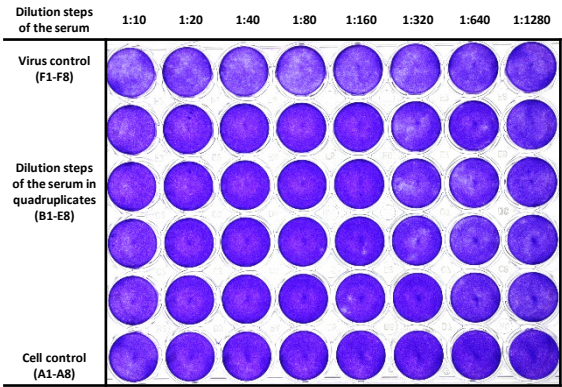

SARS-CoV-2 patient 1 (8 d.a.P.):  
PRNT 1:160.

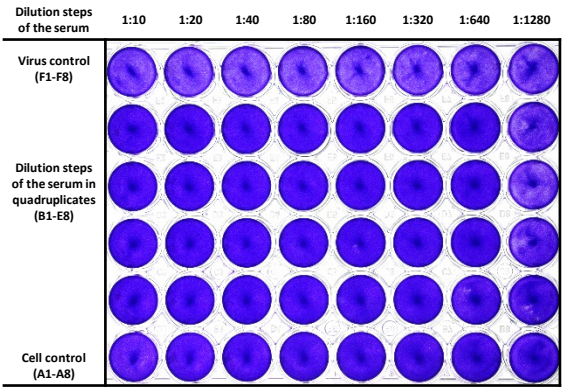

SARS-CoV-2 patient 1 (11 d.a.P.):  
PRNT 1:640.

d.a.P., days after the PCR  
d.b.P., days before the PCR

Figure S1: continued.

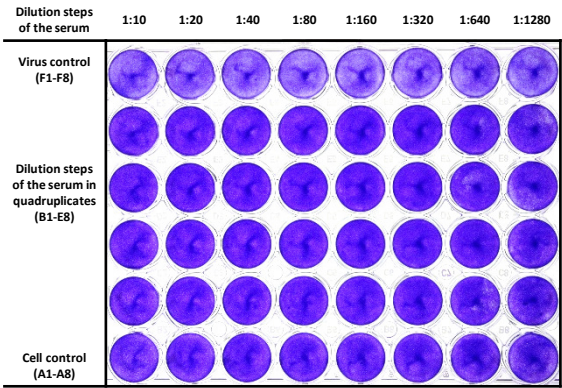

SARS-CoV-2 patient 1 (15 d.a.P.):  
PRNT  $\geq$ 1:1280.

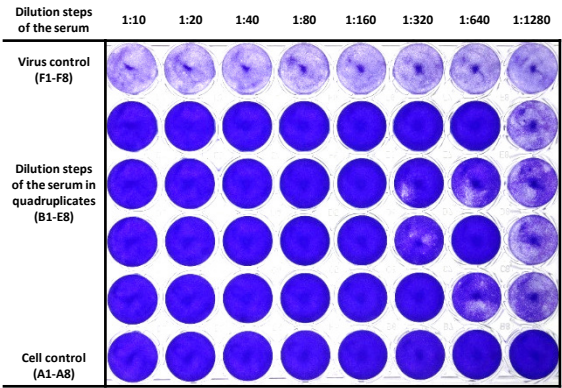

SARS-CoV-2 patient 1 (26 d.a.P.):  
PRNT 1:640.

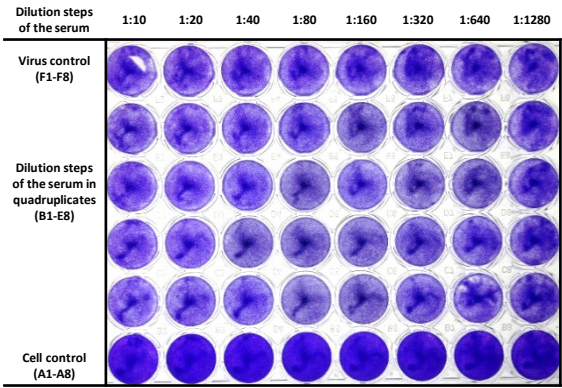

SARS-CoV-2 patient 2 (9 d.b.P.):  
PRNT <1:10.

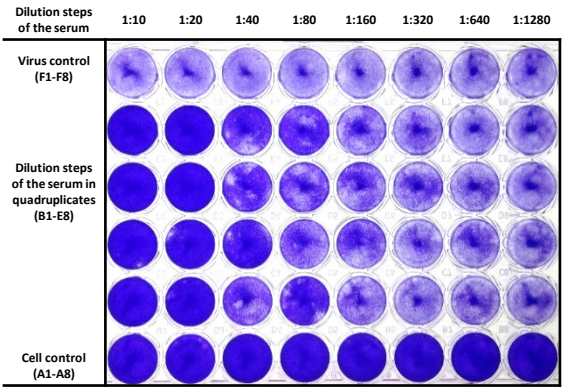

SARS-CoV-2 patient 2 (19 d.a.P.):  
PRNT 1:20 - 1:40.

d.a.P., days after the PCR  
d.b.P., days before the PCR



Figure S1: continued.

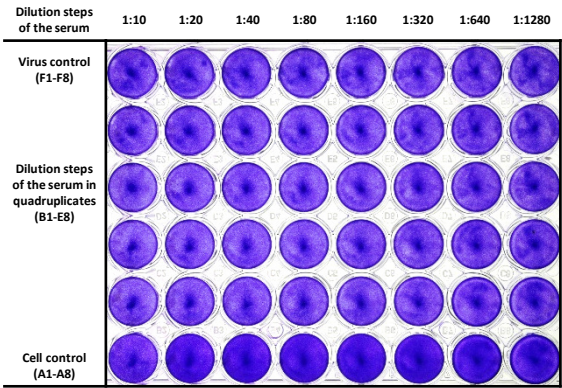

SARS-CoV-2 patient 3 (0 d.a.P.):  
PRNT <1:10.

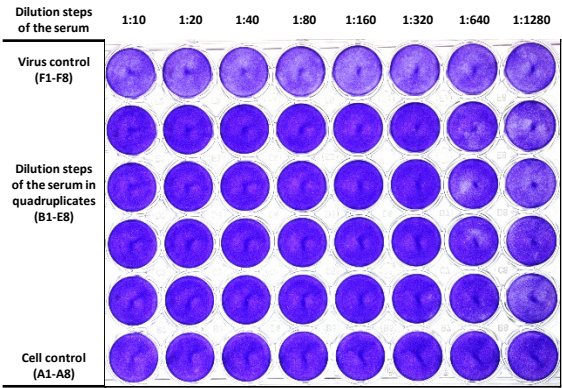

SARS-CoV-2 patient 3 (29 d.a.P.):  
PRNT 1:320.

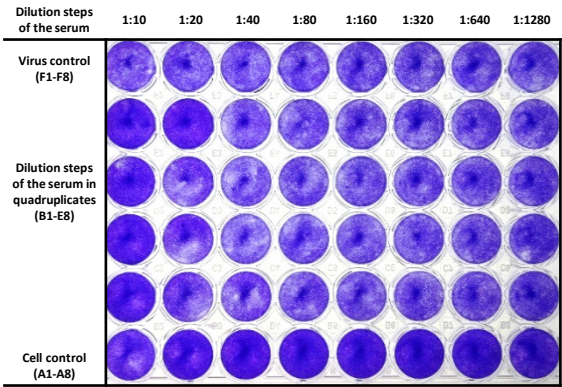

SARS-CoV-2 patient 4 (16 d.a.P.):  
PRNT 1:10.

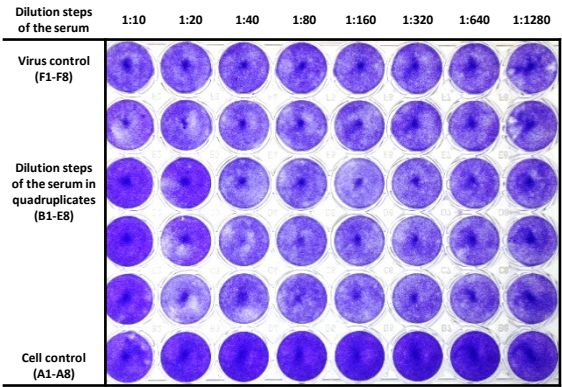

SARS-CoV-2 patient 5 (15 d.a.P.):  
PRNT ≤ 1:10.

d.a.P., days after the PCR  
d.b.P., days before the PCR

Figure S1: continued.

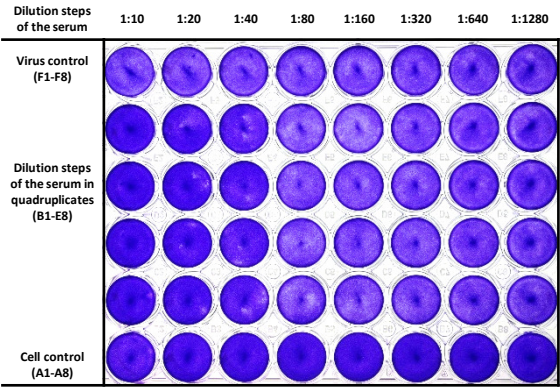

**SARS-CoV-2 patient 6 (3\* d.a.P.):**  
PRNT 1:40.  
\* The patient reported longstanding symptoms

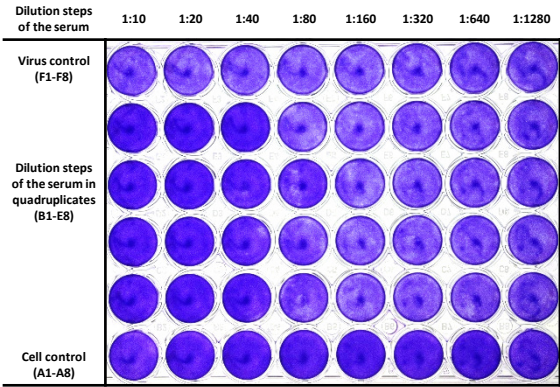

**SARS-CoV-2 patient 7 (24 d.a.P.):**  
PRNT 1:40.

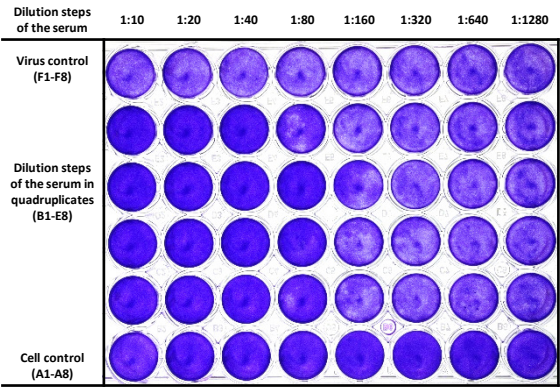

**SARS-CoV-2 patient 8 (24 d.a.P.):**  
PRNT 1:80.

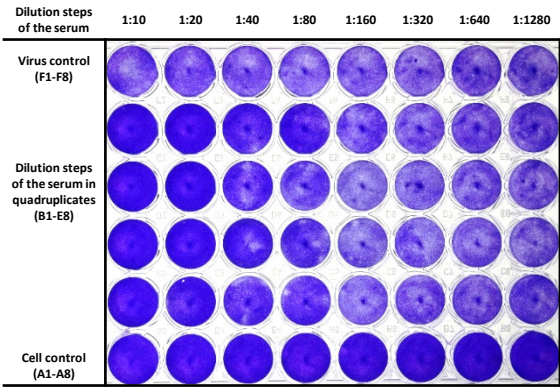

**SARS-CoV-2 patient 9 (10 d.a.P.):**  
PRNT 1:40.

d.a.P., days after the PCR  
d.b.P., days before the PCR



Figure S1: continued.

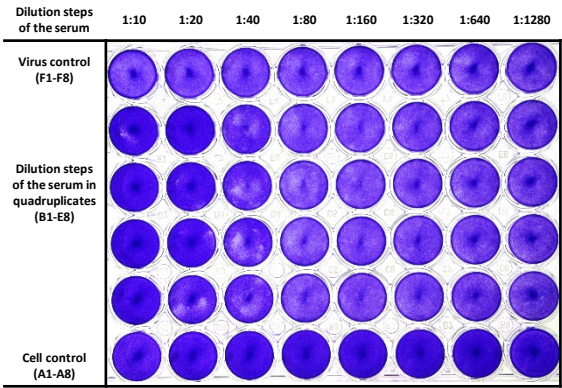

SARS-CoV-2 patient 9 (16 d.a.P.):  
PRNT 1:20.

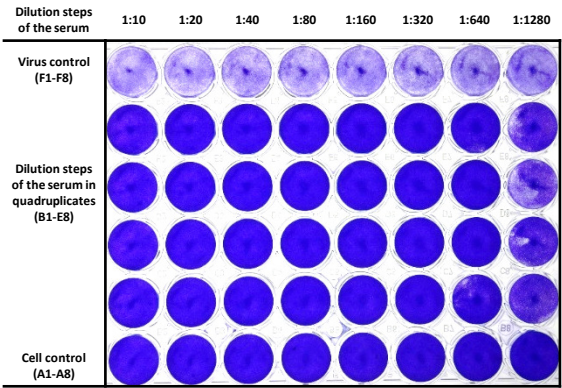

SARS-CoV-2 patient 10 (13 d.a.P.):  
PRNT 1:640.

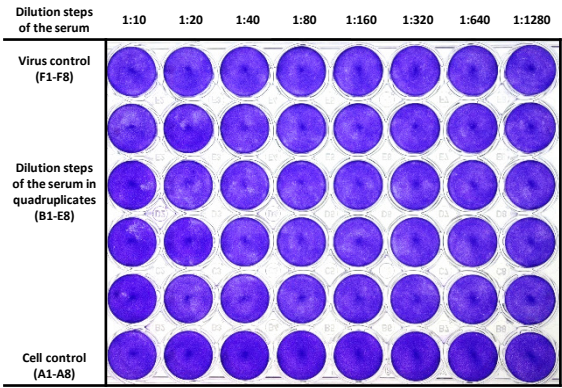

SARS-CoV-2 patient 11 (19 d.a.P.):  
PRNT ≤ 1:10.

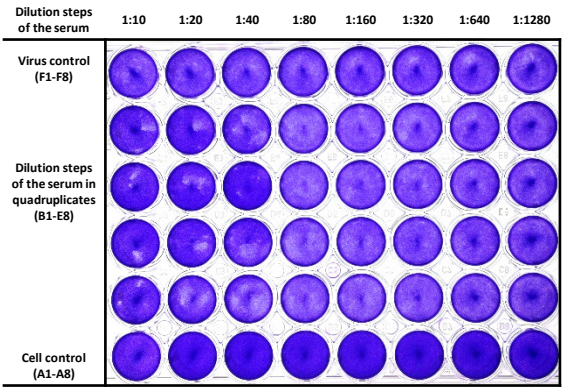

SARS-CoV-2 patient 12 (10 d.a.P.):  
PRNT 1:10 - 1:20.

d.a.P., days after the PCR  
d.b.P., days before the PCR



Figure S1: continued.

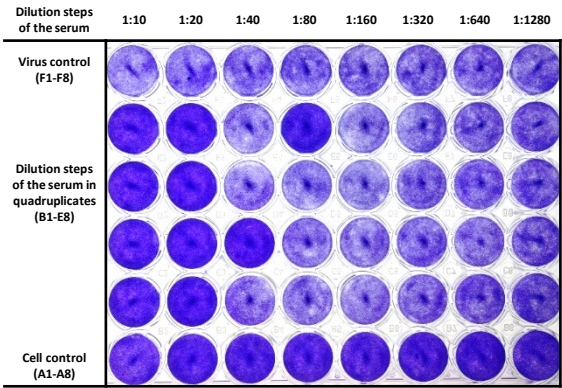

SARS-CoV-2 patient 13 (14 d.a.P.):  
PRNT 1:20.

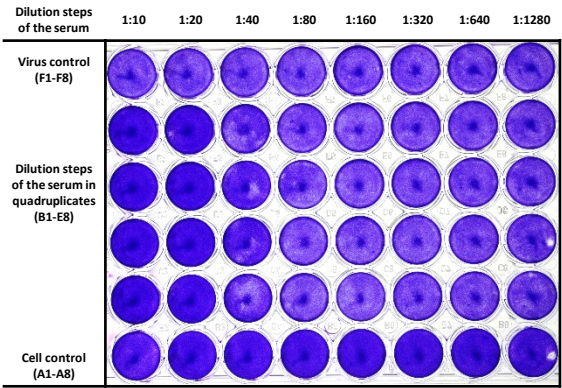

SARS-CoV-2 patient 14 (22 d.a.P.):  
PRNT 1:20 - 1:40.

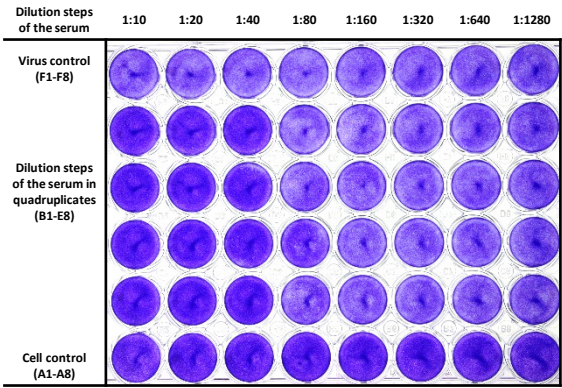

SARS-CoV-2 patient 15 (31 d.a.P.):  
PRNT 1:40.

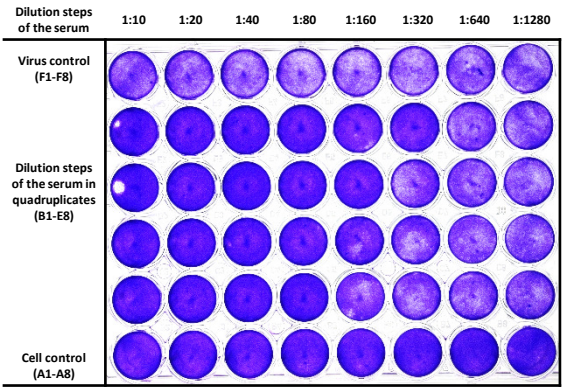

SARS-CoV-2 patient 16 (16 d.a.P.):  
PRNT 1:160.

d.a.P., days after the PCR  
d.b.P., days before the PCR

Figure S1: continued.

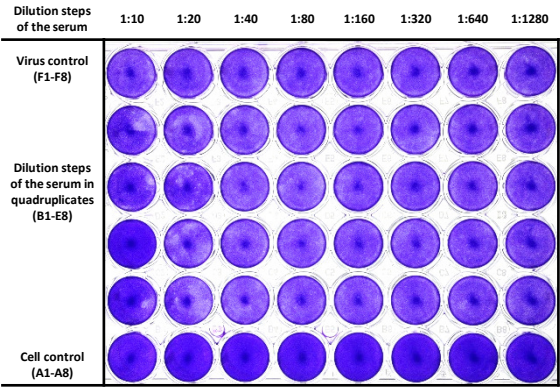

SARS-CoV-2 patient 17 (38 d.a.P.):  
PRNT  $\leq 1:10$ .

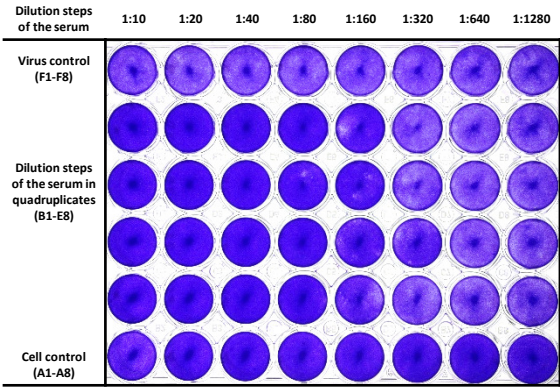

SARS-CoV-2 patient 18 (26 d.a.P.):  
PRNT 1:160.

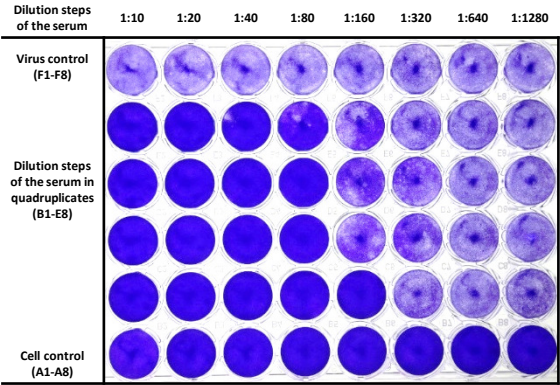

SARS-CoV-2 patient 18 (46 d.a.P.):  
PRNT 1:80.

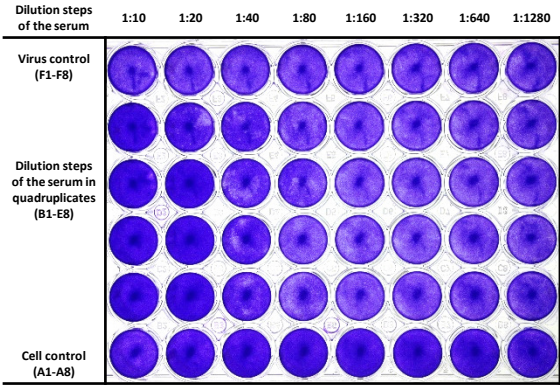

SARS-CoV-2 patient 19 (27 d.a.P.):  
PRNT 1:20 - 1:40.

d.a.P., days after the PCR  
d.b.P., days before the PCR



**Figure S1: continued.**

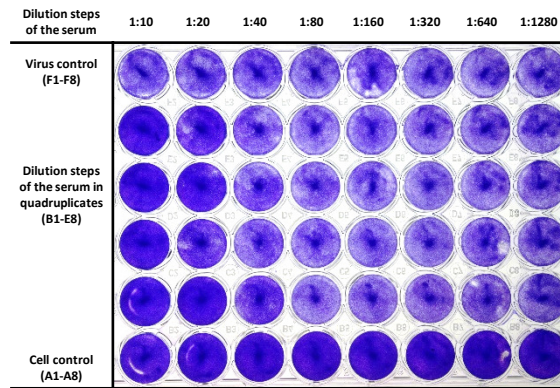

**SARS-CoV-2 patient 19 (47 d.a.P.):**  
PRNT 1:20.

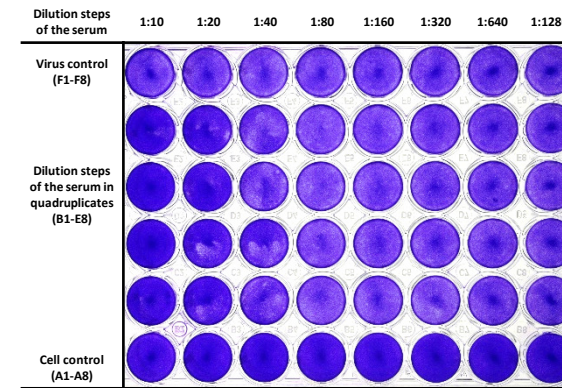

**SARS-CoV-2 patient 20 (31 d.a.P.):**  
PRNT 1:10 - 1:20.

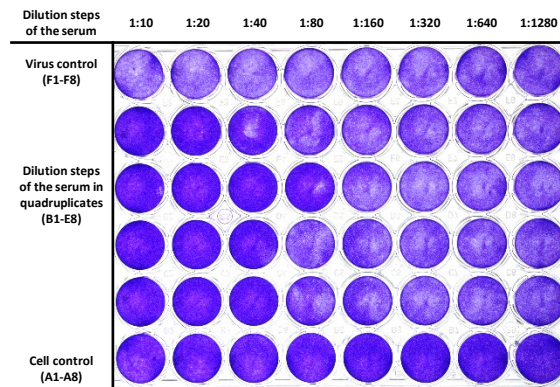

**SARS-CoV-2 patient 21 (19 d.a.P.):**  
PRNT 1:40.

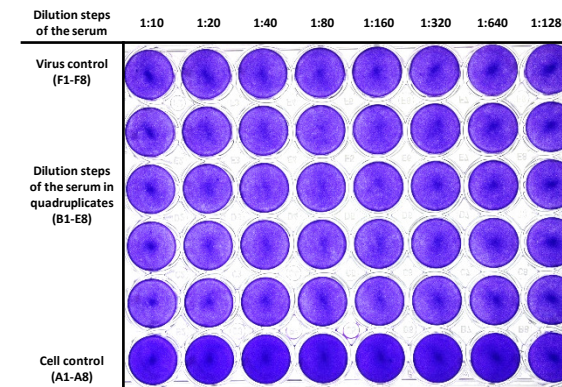

**SARS-CoV-2 patient 22 (43 d.a.P.):**  
PRNT <1:10.

d.a.P., days after the PCR  
d.b.P., days before the PCR



Figure S1: continued.

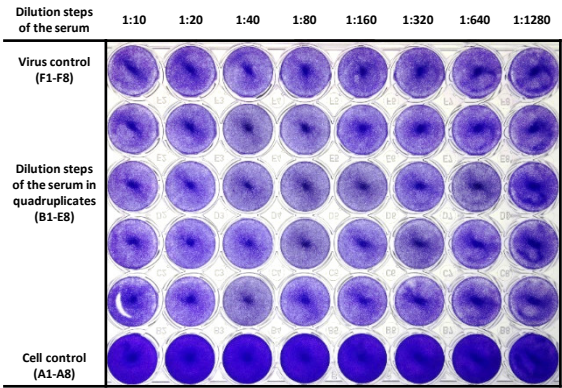

SARS-CoV-2 patient 22 (60 d.a.P.):  
PRNT <1:10.

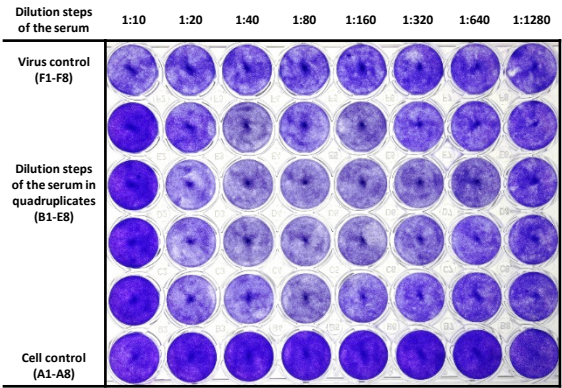

SARS-CoV-2 patient 23 (12 d.a.P.):  
PRNT 1:10.

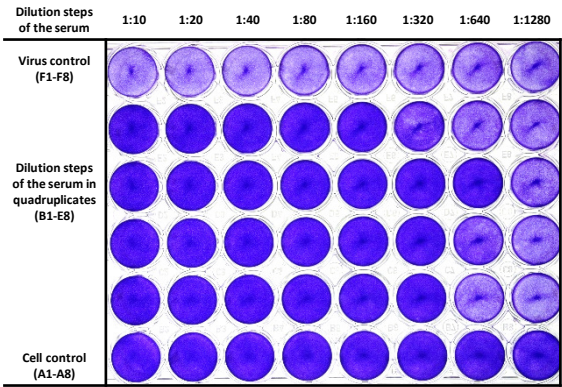

SARS-CoV-2 patient 24 (20 d.a.P.):  
PRNT 1:320.

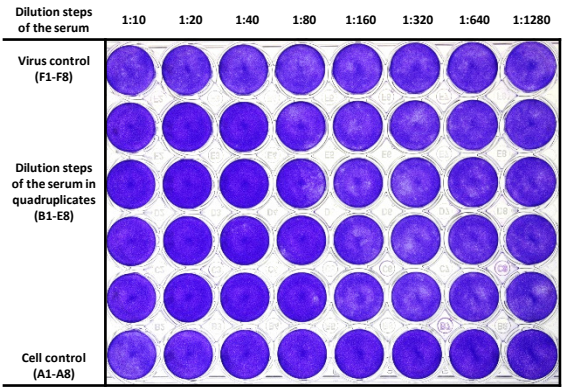

SARS-CoV-2 patient 25 (17 d.a.P.):  
PRNT 1:40 - 1:80.

d.a.P., days after the PCR  
d.b.P., days before the PCR

Figure S1: continued.

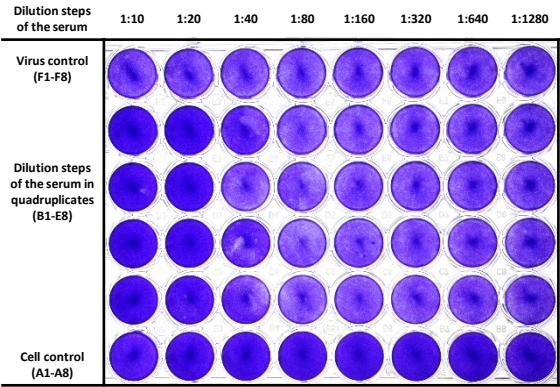

SARS-CoV-2 patient 26 (35 d.a.P.):  
PRNT 1:20.

d.a.P., days after the PCR  
d.b.P., days before the PCR
