# Supplementary figures and images for: Kinetics of Nucleo- and Spike Protein-Specific Immunoglobulin G and of Virus-Neutralizing Antibodies after SARS-CoV-2 Infection
Source: MDPI journal article supplement (doi:10.3390/microorganisms8101572), 2020-10-13

**Figure S4:** Agreement of titers from two independent neutralization tests.

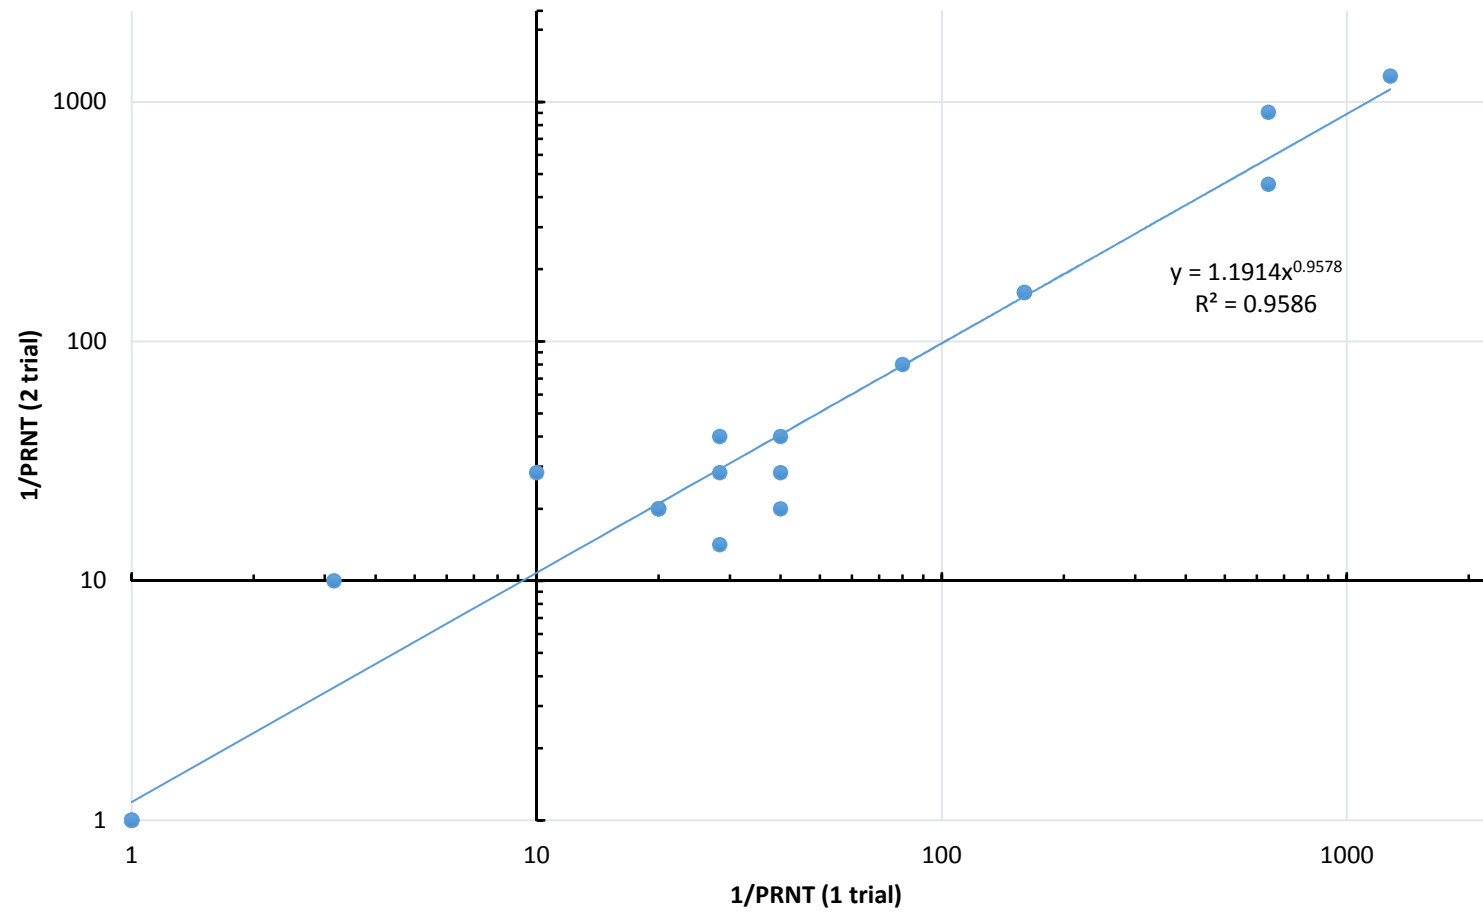

Supplement: s1 [file s1]
